# Supplementary material for: Aryl Hydrocarbon Receptor and Autophagy-Related Protein Microtubule-Associated Protein Light Chain 3 Expression in Psoriasis
Source: PubMed Central journal article supplement — Ann Dermatol. 2021 Mar 8;33(2):138–46. doi: 10.5021/ad.2021.33.2.138 (PMC8082009; doi:10.5021/ad.2021.33.2.138), 2021-03-08
Supplement: ad-33-138-s005.pdf [file ad-33-138-s005.pdf]

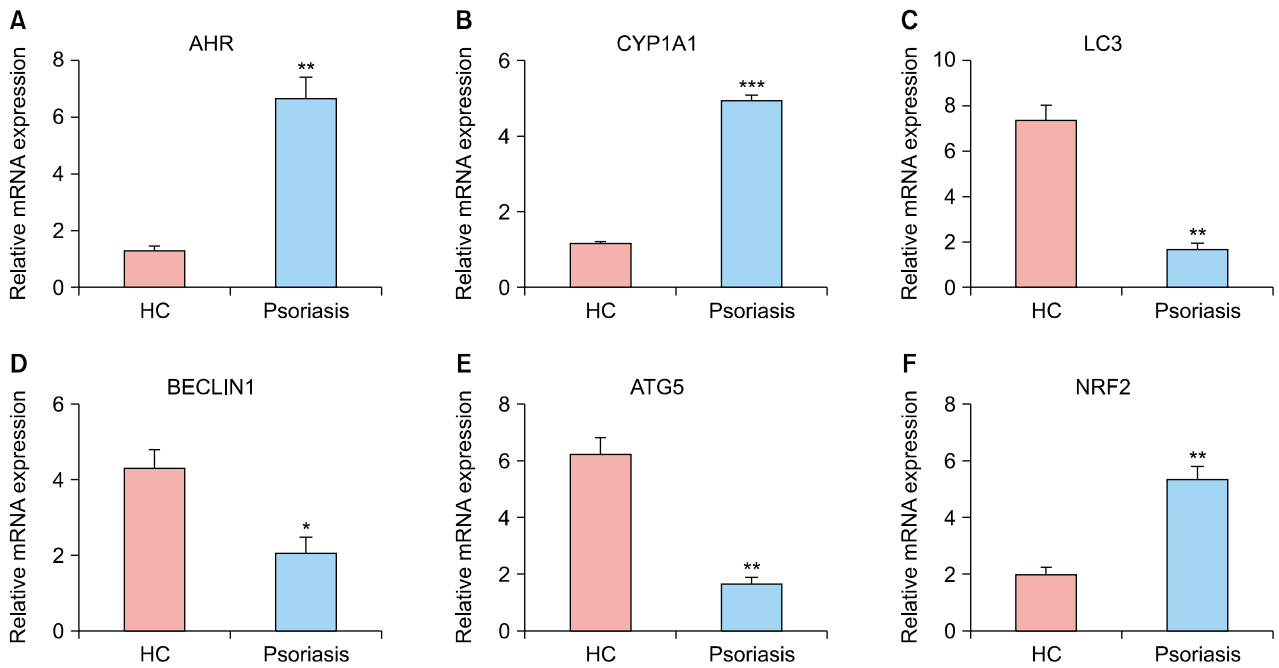

**Supplementary Fig. 3.** *AHR*, *CYP1A1*, *LC3*, *ATG5*, *BECN1*, *NRF2* mRNA expression in psoriatic lesional skin. Quantitative polymerase chain reaction analysis of (A) *AHR*, (B) *CYP1A1*, (C) *LC3*, (D) *BECN1*, (E) *ATG5*, and (F) *NRF2* expression in human psoriasis lesion ( $n=5$ ) and HC tissues ( $n=5$ ). Data represent the mean  $\pm$  standard deviation of three independent experiments (each performed in duplicate). *LC3*: microtubule-associated protein light chain 3, *HC*: healthy control. Statistical significance was determined by Student's *t*-test (\* $p < 0.05$ , \*\* $p < 0.01$ , \*\*\* $p < 0.001$ ) in comparison to controls.
